# Supplementary material for: Ubiquitin-Specific Protease 6 n-Terminal-like Protein (USP6NL) and the Epidermal Growth Factor Receptor (EGFR) Signaling Axis Regulates Ubiquitin-Mediated DNA Repair and Temozolomide-Resistance in Glioblastoma
Source: MDPI journal article supplement (doi:10.3390/biomedicines10071531), 2022-06-28
Supplement: s1 [file s1]

## SUPPLEMENTARY INFORMATION

Ubiquitin-specific protease 6 n-terminal-like protein (USP6NL) and epidermal growth factor receptor (EGFR) signaling axis regulates the ubiquitin-mediated DNA repair and temozolomide-resistance in glioblastoma

I-Chang Su<sup>1,2,3,4</sup>, Yu-Kai Su<sup>1,2,3,4</sup>, Hao-Yu Chuang<sup>5,6,7</sup>, Vijesh Kumar Yadav<sup>7</sup>, Syahru Agung Setiawan<sup>8</sup>, Iat-Hang Fong<sup>1,2,3,4</sup>, Chi-Tai Yeh<sup>1,2,3,4,9\*</sup>, Hui-Chuan Huang<sup>10</sup> and Chien-Min Lin<sup>1,2,3,4\*</sup>

1 Graduate Institute of Clinical Medicine, College of Medicine, Taipei Medical University, Taipei City 11031, Taiwan.

2 Department of Neurology, School of Medicine, College of Medicine, Taipei Medical University, Taipei City 11031, Taiwan.

3 Division of Neurosurgery, Department of Surgery, Taipei Medical University-Shuang Ho Hospital, New Taipei City 23561, Taiwan.

4 Taipei Neuroscience Institute, Taipei Medical University, Taipei 11031, Taiwan.

5 Cell Therapy Center, Tainan Municipal An-Nan Hospital-China Medical University, Tainan, Taiwan.

6 Division of Neurosurgery, Tainan Municipal An-Nan Hospital-China Medical University, Tainan, Taiwan.

7 Division of Neurosurgery, China Medical University Beigang Hospital, Yunlin, Taiwan.

8 International Ph.D. Program in Medicine, College of Medicine, Taipei Medical University, Taipei City 11031, Taiwan

9 Department of Medical Research & Education, Shuang Ho Hospital, Taipei Medical University, New Taipei City 23561, Taiwan.

10 College of Nursing, Taipei Medical University, Taipei, Taiwan.

\*Corresponding author

Dr. Chien-Min Lin, Division of Neurosurgery, Department of Surgery, Taipei Medical University-Shuang Ho Hospital, New Taipei City 23561, Taiwan. E-mail: [m513092004@tmu.edu.tw](mailto:m513092004@tmu.edu.tw)

Dr. Chi-Tai Yeh, Department of Medical Research & Education, Shuang Ho Hospital, Taipei Medical University, New Taipei City 23561, Taiwan. E-mail: [ctyeh@s.tmu.edu.tw](mailto:ctyeh@s.tmu.edu.tw)

## Supplementary Table

**Supplementary Table S1. Baseline clinical characteristics and outcome of GBM patients in SHH-GBM cohort.**

| Characteristics (n=60) |                           | Cases | Percentage (%) |
|------------------------|---------------------------|-------|----------------|
| <b>Age</b>             | Less than or equal 60 y.o | 34    | 52.3%          |
|                        | More than 60 y.o          | 31    | 47.7%          |
| <b>Gender</b>          | Male                      | 32    | 49.2%          |
|                        | Female                    | 33    | 50.8%          |
| <b>Tumor Location</b>  | Frontal                   | 17    | 26.2%          |
|                        | Parietal                  | 6     | 9.2%           |
|                        | Temporal                  | 21    | 32.3%          |
|                        | Occipital                 | 1     | 1.5%           |
|                        | Others                    | 20    | 30.8%          |
| <b>Recurrences</b>     | Yes                       | 3     | 4.6%           |
|                        | No                        | 62    | 95.4%          |

y.o: years old

**Supplementary Table S2. List of primary antibodies used for immunoblotting and immunostaining.**

| <b>Primary antibody</b> | <b>Company</b> | <b>Host species</b> | <b>Clonality</b> | <b>Concentration</b> | <b>Catalogue Number</b> |
|-------------------------|----------------|---------------------|------------------|----------------------|-------------------------|
| <b>USP6NL</b>           | Creative       | Rabbit              | Monoclonal       | 1:1,000 (WB)         | DCABH-17363             |
|                         | Diagnostics    |                     |                  | 1:100 (IHC)          |                         |
| <b>EGFR</b>             | Abcam          | Rabbit              | Monoclonal       | 1:1,000 (WB)         | ab52894                 |
|                         |                |                     |                  | 1:20 (IP)            |                         |
| <b>CD44</b>             | Cell Signaling | Mouse               | Monoclonal       | 1:1,000 (WB)         | 3570                    |
| <b>ABCG2</b>            | Cell Signaling | Rabbit              | Monoclonal       | 1:5,000 (WB)         | 3579                    |
| <b>Nanog</b>            | Cell Signaling | Rabbit              | Monoclonal       | 1:5,000 (WB)         | 4903                    |
| <b>CD133</b>            | Proteintech    | Rabbit              | Polyclonal       | 1:1,000 (WB)         | 18495-1-AP              |
| <b>SOX2</b>             | GeneTex        | Mouse               | Monoclonal       | 1:1,000 (WB)         | GTX627405               |
| <b>E-cadherin</b>       | Cell Signaling | Rabbit              | Monoclonal       | 1:100 (IF)           | 3195                    |
| <b>N-cadherin</b>       | Cell Signaling | Rabbit              | Monoclonal       | 1:100 (IF)           | 13116                   |
| <b>γH2AX</b>            | Cell Signaling | Rabbit              | Monoclonal       | 1:100 (IF)           | 7631                    |
| <b>RAD51</b>            | Abcam          | Rabbit              | Polyclonal       | 1:100 (IF)           | ab63801                 |
| <b>BRCA2</b>            | ThermoFisher   | Rabbit              | Polyclonal       | 1:100 (IF)           | PA5-96128               |
| <b>ATG5</b>             | Abcam          | Rabbit              | Polyclonal       | 1:100 (IF)           | ab228668                |
|                         |                |                     |                  | 1:2,000 (WB)         |                         |
| <b>ATG7</b>             | Abcam          | Rabbit              | Monoclonal       | 1:100 (IF)           | ab133528                |
|                         |                |                     |                  | 1:2,000 (WB)         |                         |
| <b>LC3A/B</b>           | Cell Signaling | Rabbit              | Polyclonal       | 1:100 (IF)           | 4108                    |
|                         |                |                     |                  | 1:1,000 (WB)         |                         |
| <b>Beclin-1</b>         | Abcam          | Rabbit              | Polyclonal       | 1:100 (IF)           | ab62557                 |
|                         |                |                     |                  | 1:2,000 (WB)         |                         |
| <b>GAPDH</b>            | PROTEINTECH    | Mouse               | Monoclonal       | 1:10,000 (WB)        | 60004-1-Ig              |

WB: western blot; IF: immunofluorescence; IHC: immunohistochemistry; IP: immunoprecipitation

Supplementary Table S3. Cohen's Kappa values for each pathologist, assessing expression Q-score of USP6L in glioma tissue.

| Pathologist_B | Pathologist_A |            |           |           |            |
|---------------|---------------|------------|-----------|-----------|------------|
|               | 0-75          | 76-150     | 151-225   | 226-300   |            |
| 0-75          | 2             | 0          | 0         | 0         | 2 (6.7%)   |
| 76-150        | 1             | 8          | 0         | 0         | 9 (30.0%)  |
| 151-225       | 0             | 5          | 5         | 1         | 11 (36.7%) |
| 226-300       | 0             | 0          | 0         | 8         | 8 (26.7%)  |
|               | 3 (10.0%)     | 13 (43.3%) | 5 (16.7%) | 9 (30.0%) | 30         |

|                                   |                       |
|-----------------------------------|-----------------------|
| <b>Weighted Kappa<sup>a</sup></b> | 0.78170               |
| <b>Standard error</b>             | 0.07644               |
| <b>95% CI</b>                     | 0.63188 to<br>0.93153 |
| <b>P-value</b>                    | 1.07e-09              |

<sup>a</sup> Linear weights

**Supplementary Table S4. List of primers used for qRT-PCR amplification of each gene.**

| <b>Gene</b>    | <b>Strand</b> | <b>Sequence of Primers</b>   |
|----------------|---------------|------------------------------|
| <b>USP6NL</b>  | Forward       | 5'-TACTCAGCCTTTCAACTC-3'     |
|                | Reverse       | 5'-GCAAGTACACGTCAAATC-3      |
| <b>CD44</b>    | Forward       | 5'-CAACACAAATGGCTGGTACG-3'   |
|                | Reverse       | 5'-GTGTGGTTGAAATGGTGCTG-3'   |
| <b>ABCG2</b>   | Forward       | 5'-TTTCAGCCGTGGAAGTCTTT-3'   |
|                | Reverse       | 5'-TGAGTCCTGGGCAGAAAGTTT-3'  |
| <b>Nanog</b>   | Forward       | 5'-GTGATTTGTGGGCCTGAAGA-3'   |
|                | Reverse       | 5'-ACACAGCTGGGTGGAAGAGA-3'   |
| <b>CD133</b>   | Forward       | 5'-TCTTGACCGACTGAGACCCAAC-3' |
|                | Reverse       | 5'-ACTTGATGGATGCACCAAGCAC-3' |
| <b>SOX2</b>    | Forward       | 5'-GACAGTTACGCGCACATGAA-3'   |
|                | Reverse       | 5'-TAGGTCTGCGAGCTGGTCAT-3'   |
| <b>β-actin</b> | Forward       | 5'-CCCTAAGGCCAACCCTGAA-3'    |
|                | Reverse       | 5'-CCAGAGGCATACAGGGACAAC-3'  |

Supplementary Figure

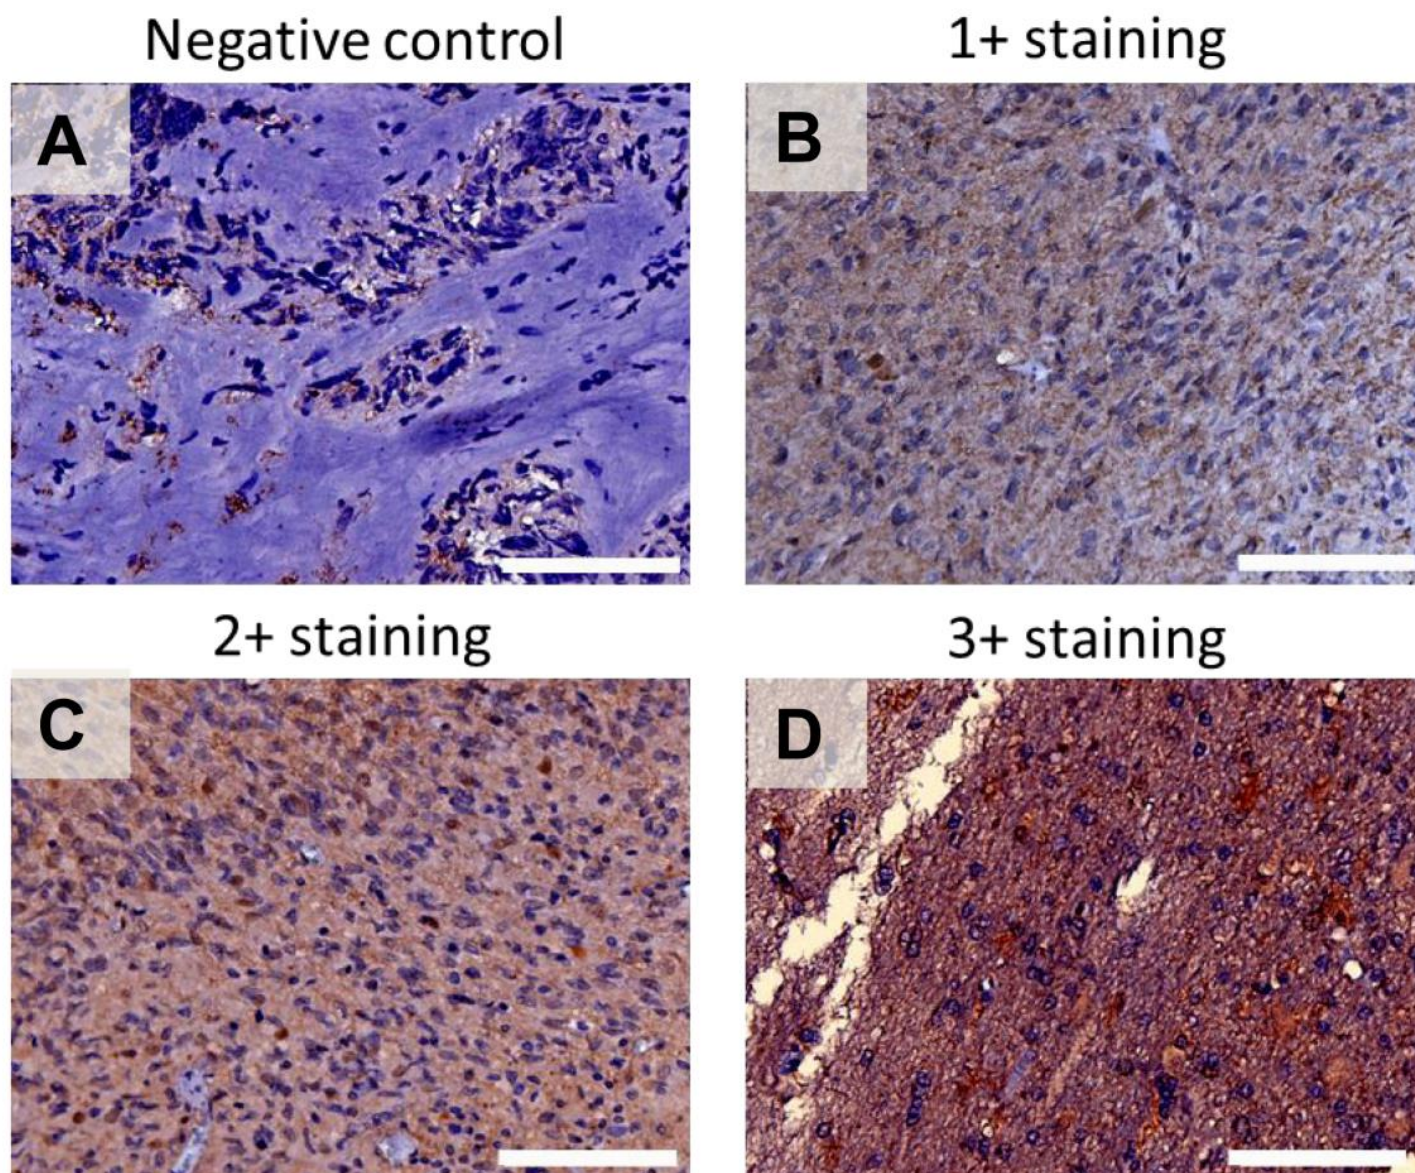

**Supplementary Figure S1. Representative staining of USP6L and control in glioma FFPE tissue sections.** Panel (A) is demonstrating a representative picture of negative control (glioma tissue stained with isotype rabbit IgG antibody), panel (B) is a representative picture of a 1+ positive glioma sample, panel (C) a representative picture of a 2+ positive glioma sample, and panel (D) a representative picture of a 3+ positive or the highest intensity of USP6L expression in glioma sample. Scale bar = 200  $\mu$ m.
